# Supplementary material
Source: publisher figshare collection journal article supplement (https://springernature.figshare.com/ndownloader/files/27609239)

## Biological process level 2 GO annotation of 0051 EST library

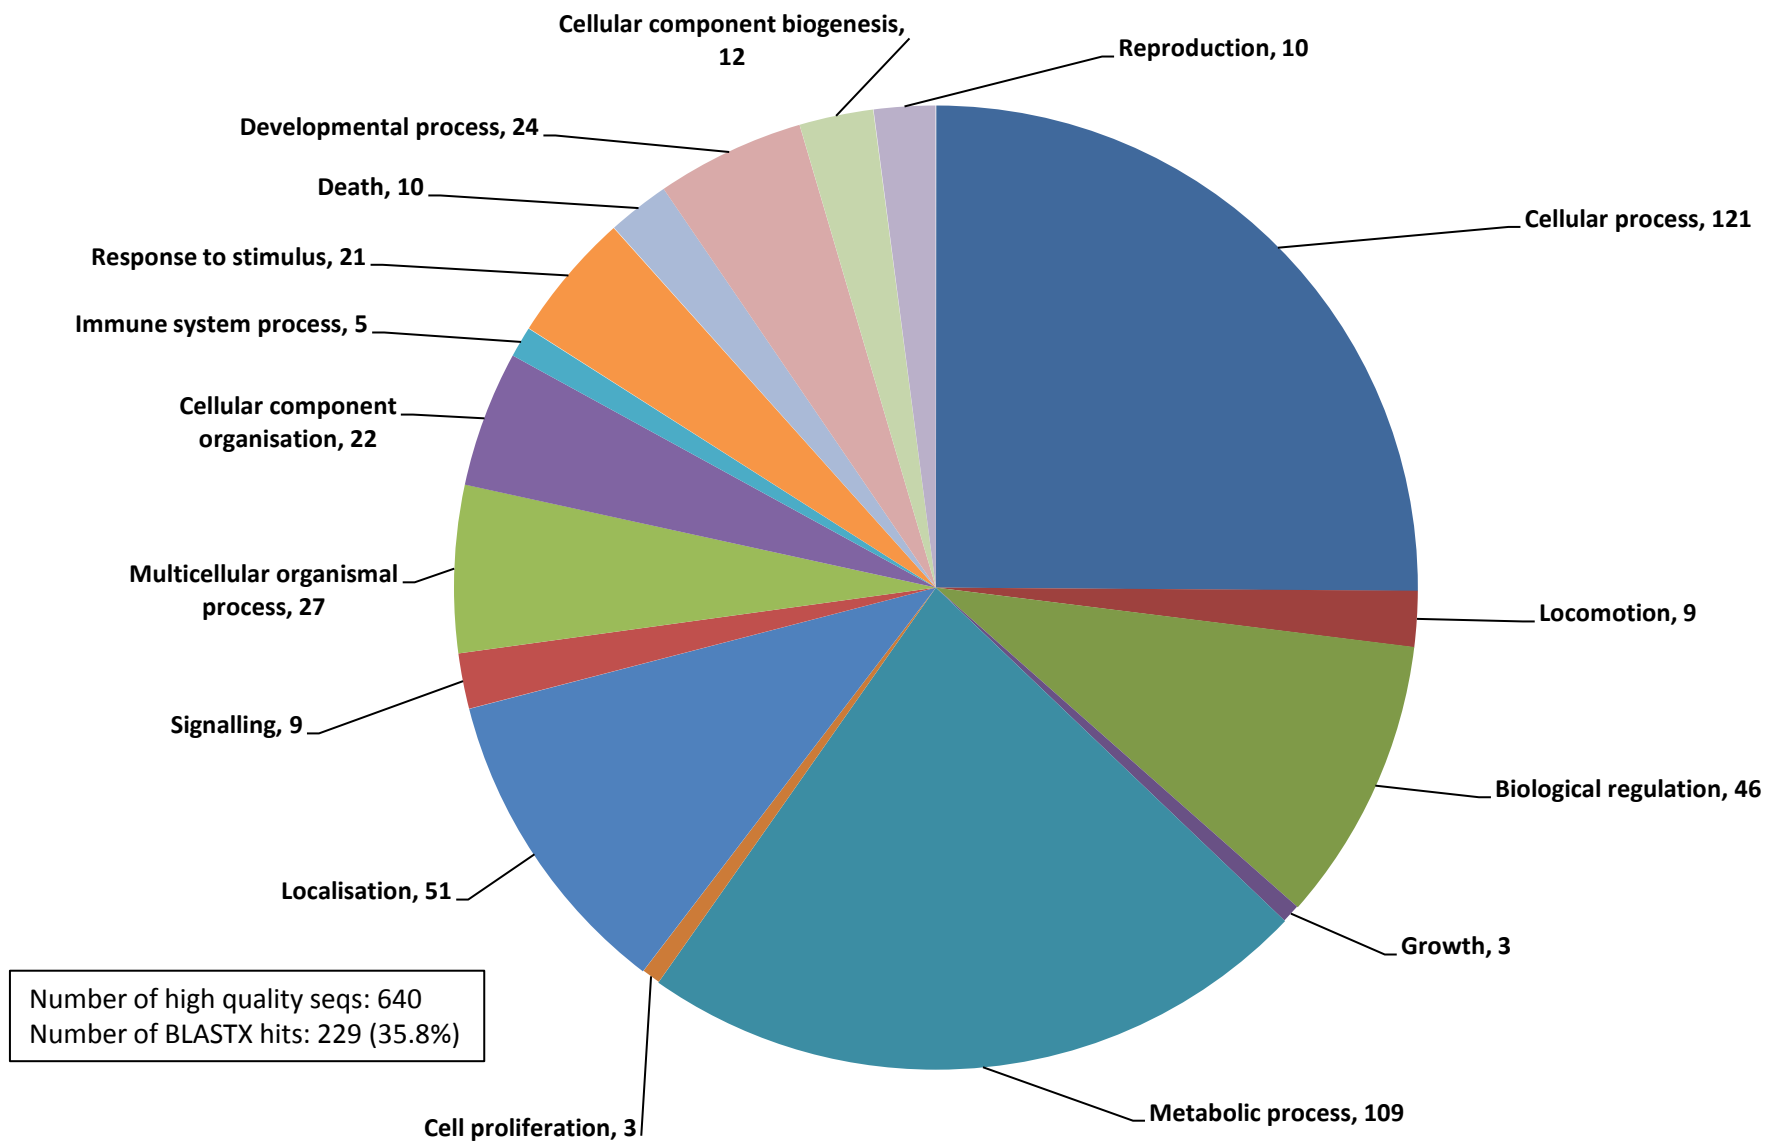

Supplement: Supplementary file [file 27609239]
